# Supplementary material for: A Bayesian framework based on a Gaussian mixture model and radial-basis-function Fisher discriminant analysis (BayGmmKda V1.1) for spatial prediction of floods
Source: Copernicus journal article supplement (doi:10.5194/gmd-10-3391-2017), 2017-09-14
Supplement: Supplementary file 1 [file gmd-10-3391-2017-supplement.zip]

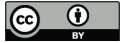

## *Supplement of*

# **A Bayesian framework based on a Gaussian mixture model and radial-basis-function Fisher discriminant analysis (BayGmmKda V1.1) for spatial prediction of floods**

**Dieu Tien Bui and Nhat-Duc Hoang**

*Correspondence to:* Nhat-Duc Hoang ([hoangnhatduc@dtu.edu.vn](mailto:hoangnhatduc@dtu.edu.vn))

- [gmd-10-3391-2017-supplement-title-page.pdf](#)
- [Supplement24\\_06\\_17](#)
  - [BayKdaGmmFloodPredict](#)
    - \* [BayGmmKdaModel.mat](#)
    - \* [Content](#)
    - \* [MainBayGmmKda.fig](#)
    - \* [MainBayGmmKda.m](#)
    - \* [PredictionResult.csv](#)
    - \* [Readme.txt](#)
    - \* [RocPlotCalculationData.mat](#)
  - [DataSet.xlsx](#)

The copyright of individual parts of the supplement might differ from the CC BY 3.0 License.
